# Supplementary figures and images for: An improved separation method for classification of Macleaya cordata from different geographical origins
Source: Royal Society of Chemistry journal article supplement (doi:10.1039/c4ay02600d), 2015-01-01

Fig. S1 ESI-MS/MS spectrum of 12 biomarker compounds.

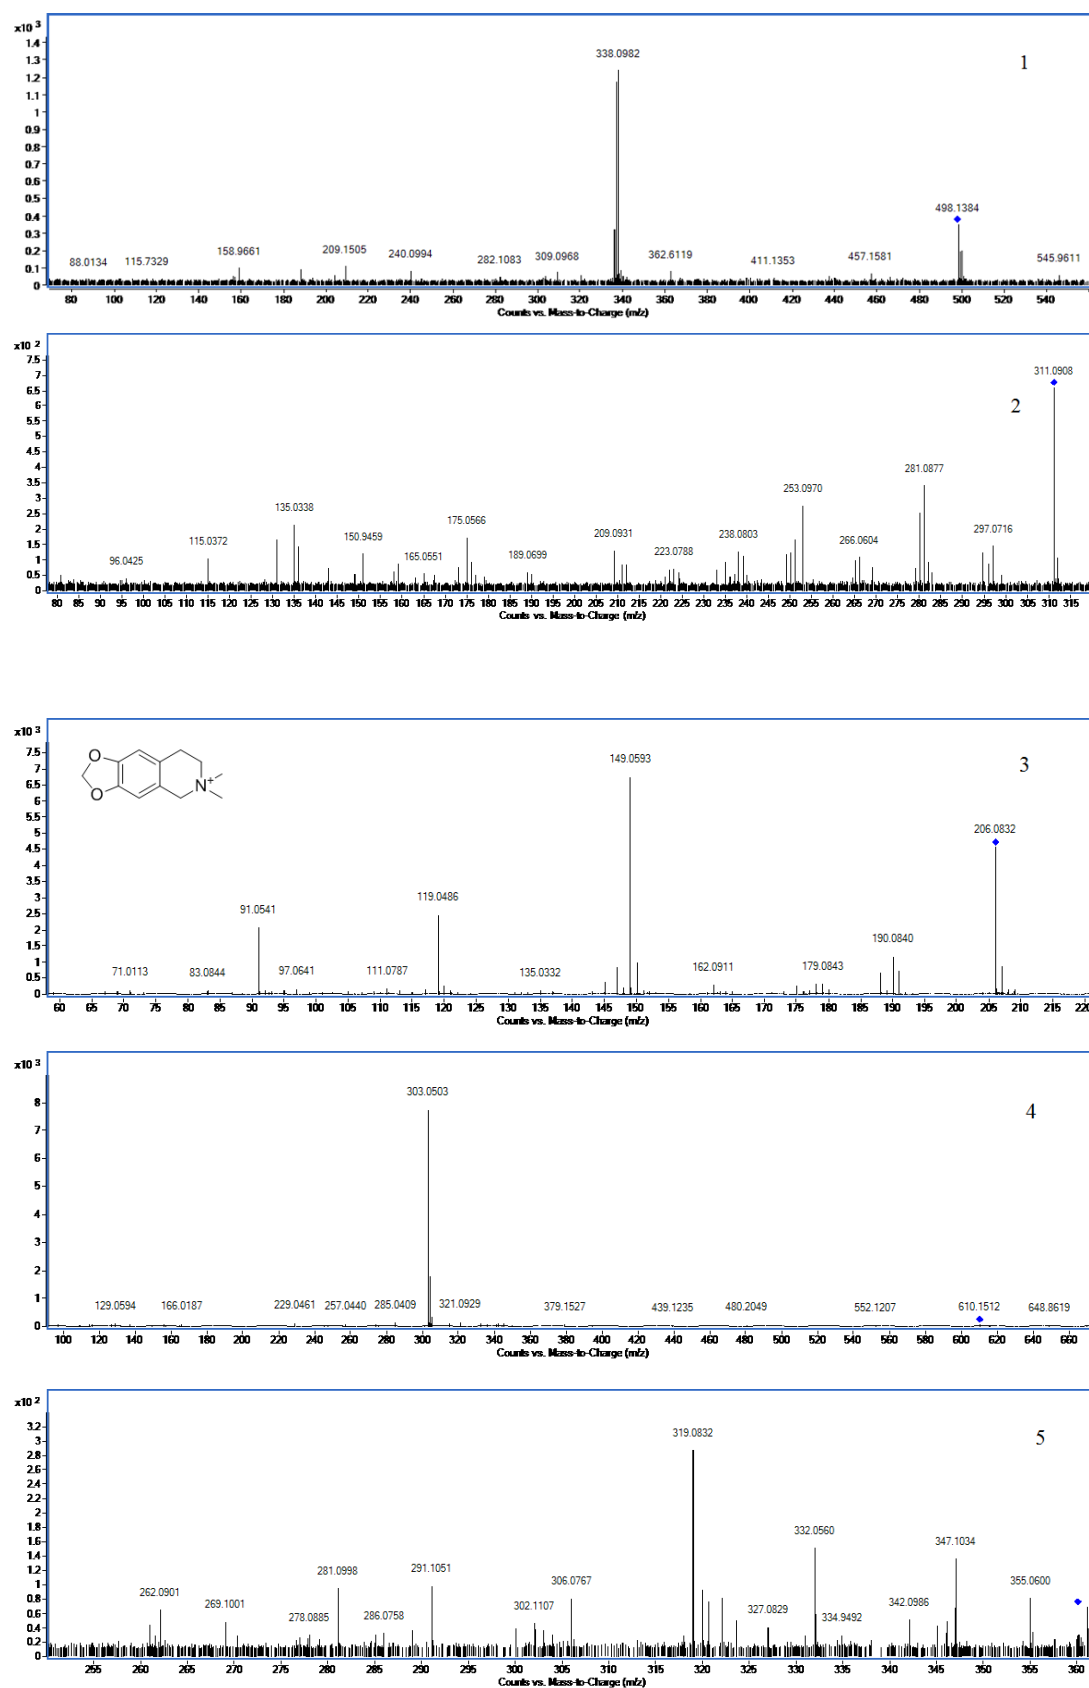

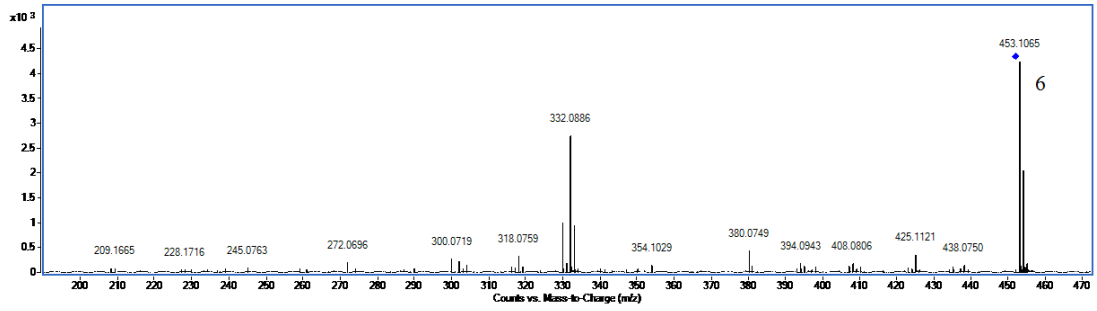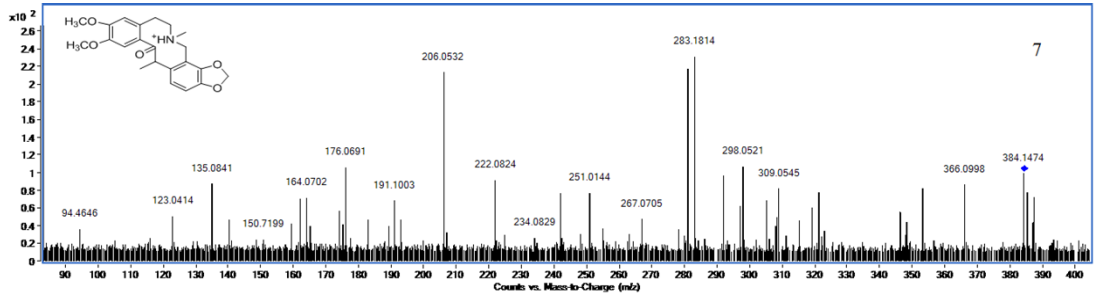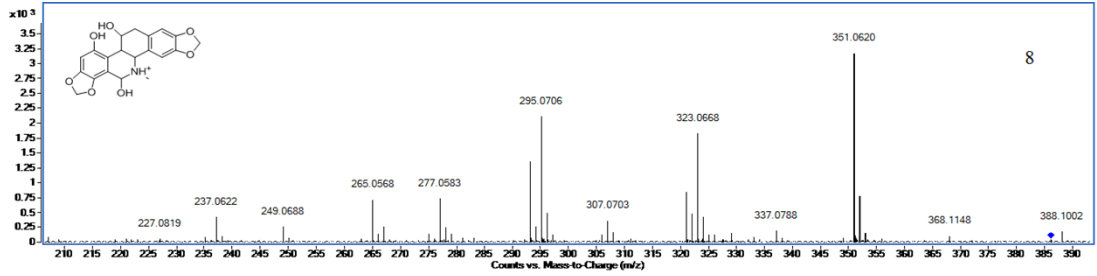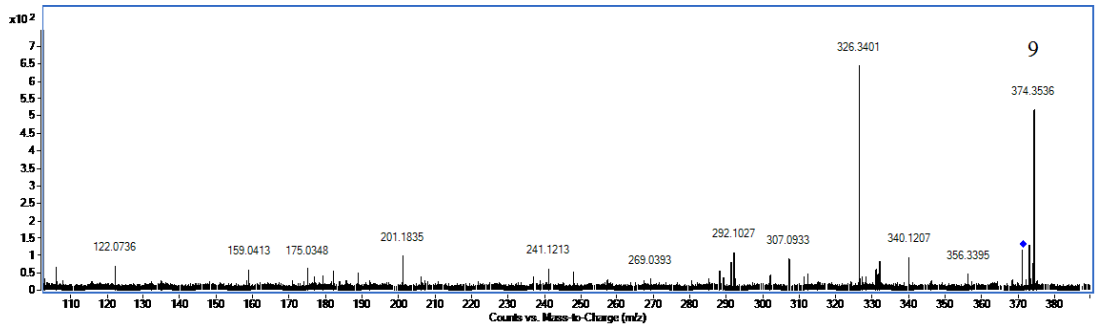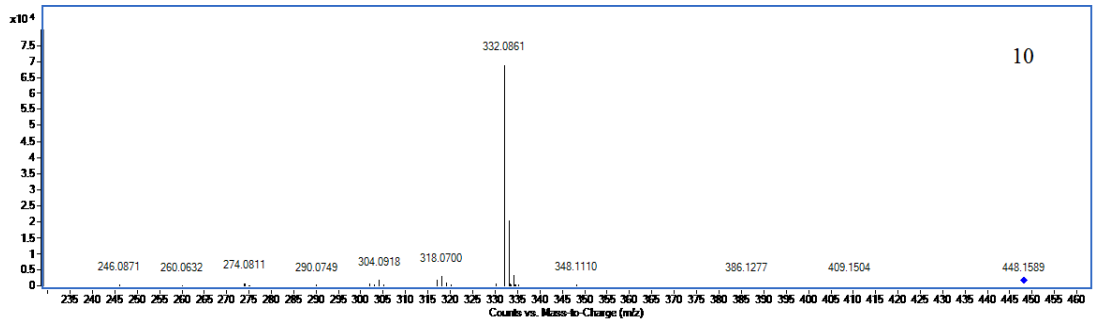

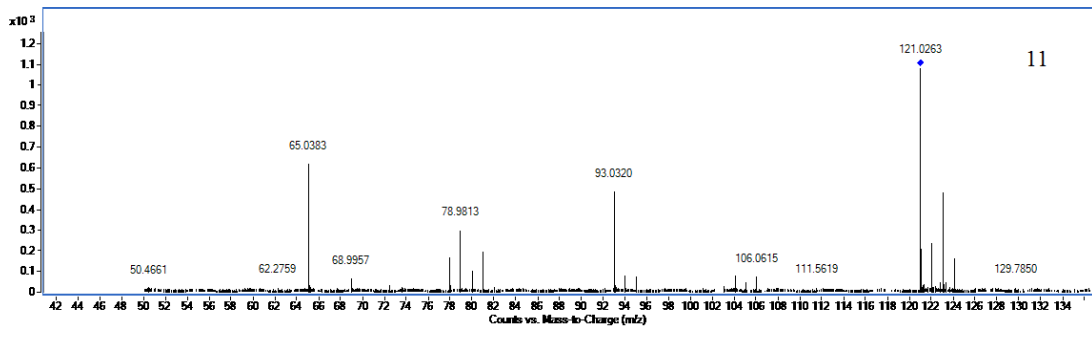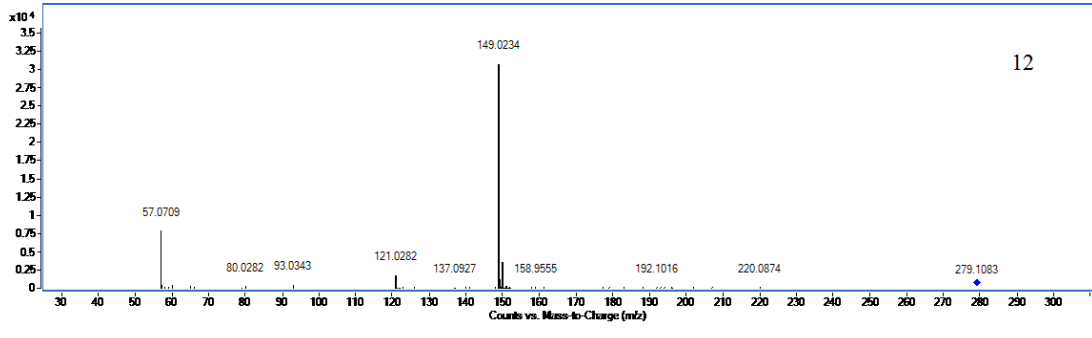

Supplement: c4ay02600d1.pdf [file c4ay02600d1.pdf]
